# Supplementary material for: Inflammation environment-adaptive matrix confinement for three-dimensional modulation of macrophages
Source: Royal Society of Chemistry journal article supplement (doi:10.1039/d4bm00939h), 2024-01-01
Supplement: d4bm00939h1.pdf [file d4bm00939h1.pdf]

## Supporting information

### **Inflammation environment-adaptive matrix confinement for three-dimensional modulation of macrophages**

Yilun Luo <sup>1,2</sup>, Sentao Hu <sup>1</sup>, Yan Li <sup>1</sup> and Lie Ma <sup>\*,1,3</sup>

1 MOE Key Laboratory of Macromolecular Synthesis and Functionalization, Department of Polymer Science and Engineering, Zhejiang University, Hangzhou 310027, China

2 MOE Key Laboratory of Prevention and Treatment of Cardiovascular and Cerebrovascular Diseases, School of Medical Information Engineering, Gannan Medical University, Ganzhou 341000, China

3 Key Laboratory of Reproductive Dysfunction Management of Zhejiang Province, Assisted Reproduction Unit, Department of Obstetrics and Gynecology, Sir Run Run Shaw Hospital, School of Medicine, Zhejiang University, Hangzhou 310016, China

\* Corresponding author: [liema@zju.edu.cn](mailto:liema@zju.edu.cn)

### **Morphological analysis of BMDMs**

After 6-7 days in culture, BMDMs were digested by 0.25% trypsin (0.02% EDTA, Cienry, Zhejiang, China), collected and resuspended at a certain density of 5,000,000 cells/mL. The scaffolds were soaked in 75% ethanol solution for sterilization and washed with PBS ten times. And then, the cell solution (200  $\mu$ L) was added to the scaffold and cultured in an incubator (37 °C, 5% CO<sub>2</sub>) to allow BMDMs attachment inside the scaffold. 800  $\mu$ L basal medium was added to the cell culture plate 2 hours later.

Macrophages morphologies were investigated by staining the cytoskeleton. The cells were fixed in 4% paraformaldehyde for 30 min at 37 °C, permeabilized with 0.5% (v/v) Triton X-100 for 20 min at 4 °C, and then blocked with 3% (w/v) BSA in PBS for 80 min at 37 °C. Cells were incubated with rhodamine-labeled phalloidin (1:1000, Thermo Fisher Scientific, USA) in 1% (w/v) BSA solution at 4 °C overnight. Then the above solution was washed and then incubated with DAPI (1:500) in 1% (w/v) BSA solution at room temperature for 30 min. The cells were observed by confocal laser scanning microscope (CLSM, LSM-880, Zeiss, Germany).

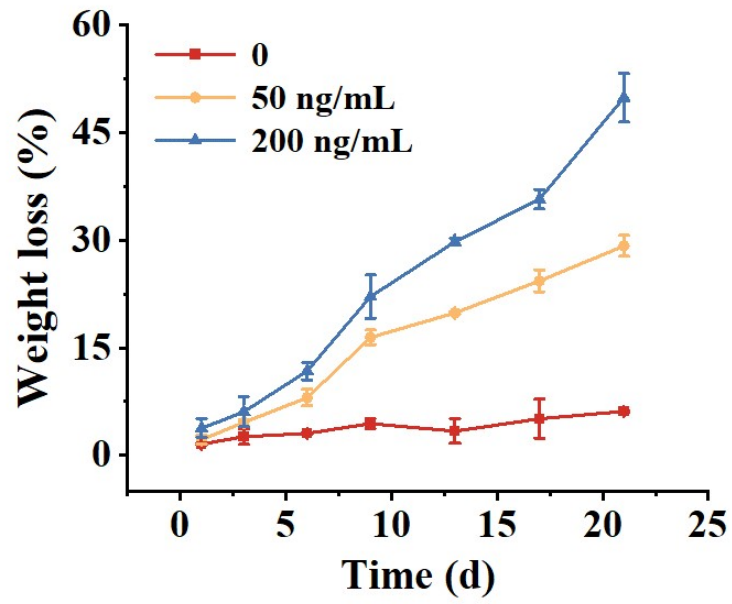

**Figure S1.** Weight loss of gelatin scaffolds at different time after treatment with 0, 50 and 200 ng/mL MMP-9.

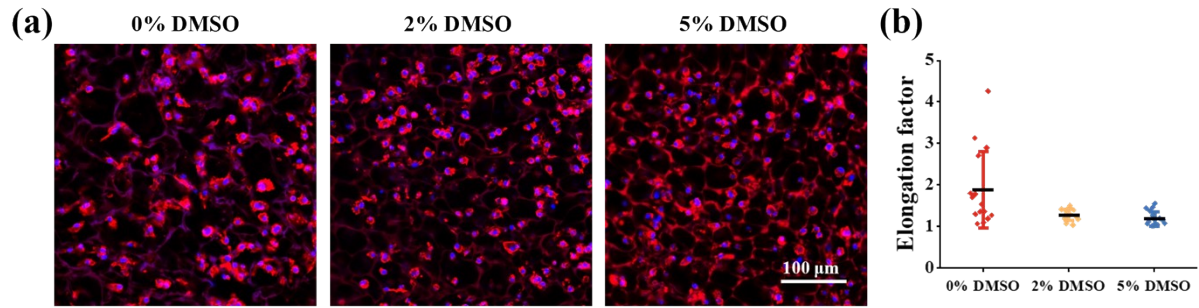

**Figure S2.** (a) CLSM images of macrophages stained for actin (red) and nuclei (blue) in auto-fluorescent gelatin scaffolds. Scale bar represents 100  $\mu\text{m}$ . (b) Quantification of cell elongation.

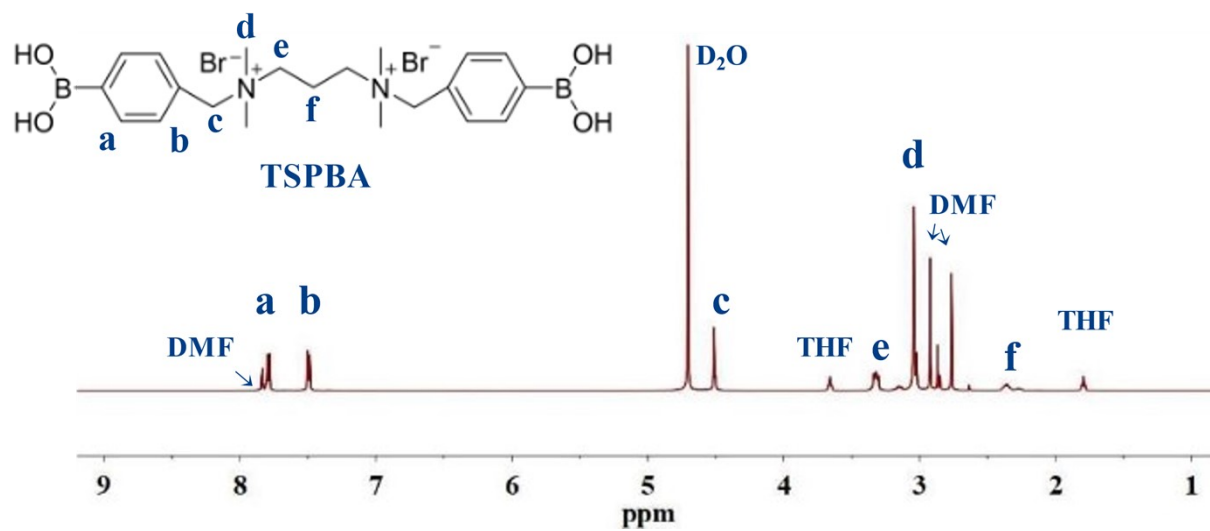

**Figure S3.** <sup>1</sup>H NMR characterizations of TSPBA.

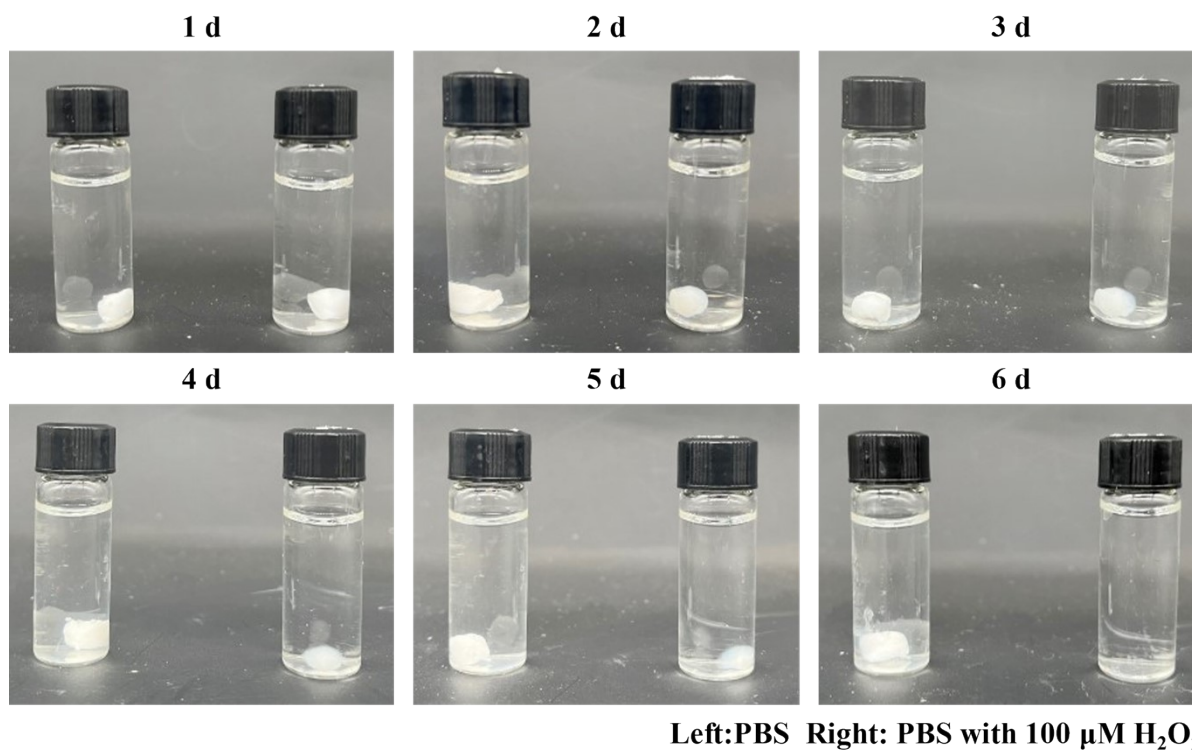

**Figure S4.** H<sub>2</sub>O<sub>2</sub>-triggered hydrogel disassembly. TSPBA-PVA-gelatin hydrogels were incubated with PBS and 100 μM H<sub>2</sub>O<sub>2</sub>.

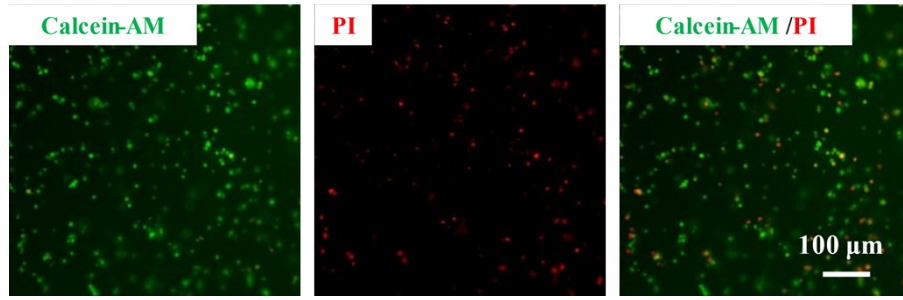

**Figure S5.** Fluorescent images of BMDMs in TSPBA-PVA hydrogels by CLSM after being cultured for 3 d. The live and dead BMSCs were stained with Calcein-AM (green) and PI (red), respectively. Scale bar represents 100  $\mu\text{m}$ .

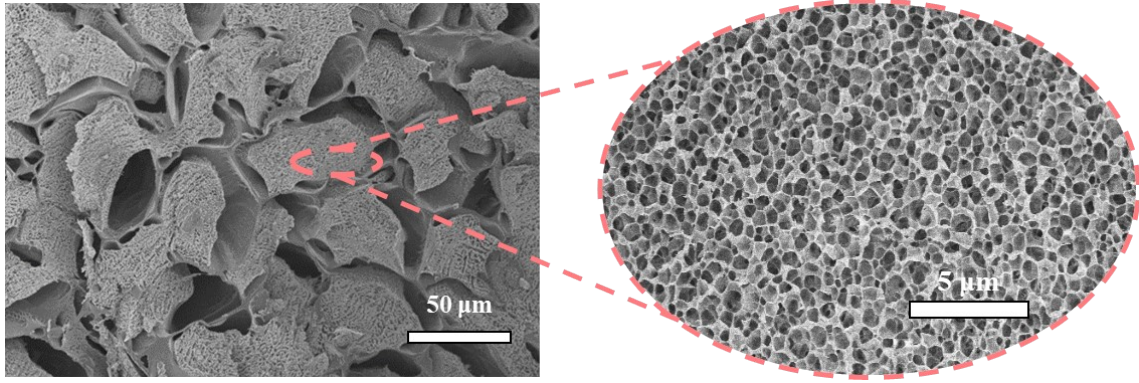

**Figure S6.** SEM images of hydrogel-filled scaffold with different magnifications.



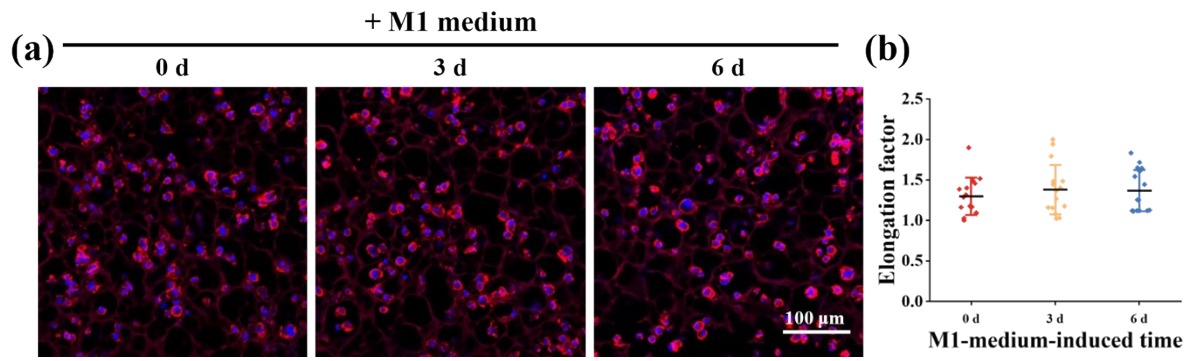

**Figure S7.** (a) CLSM images of macrophages stained for actin (red) and nuclei (blue) in auto-fluorescent BMDMs-laden hydrogel-filled scaffold after treatment with M1-polarized medium for 0 d, 3 d and 6 d. Scale bar represents 100 μm. (b) Quantification of cell elongation.
